# Supplementary material for: Knowledge, Attitudes, and Practices on COVID-19 Vaccination among General Adult Population in Malawi: A Countrywide Cross-Sectional Survey
Source: MDPI journal article supplement (doi:10.3390/vaccines12030221), 2024-02-20
Supplement: s1 [file s1]

### Supplementary Documents

Supplementary 1, **Table S1:** COVID-19 disease burden and sample size

Source: Malawi COVID-19 epidemiological report, Epi Week 8 2022: NSO, 2020

| District   | Total COVID-19 confirmed cases | Population | Burden % | Sample unit/district |
|------------|--------------------------------|------------|----------|----------------------|
| MACHINGA   | 1011                           | 735438     | 0.14     | 54                   |
| THYOLO     | 1058                           | 721456     | 0.15     | 58                   |
| NTCHEU     | 999                            | 659608     | 0.15     | 58                   |
| DEDZA      | 1278                           | 830512     | 0.15     | 60                   |
| CHIKWAWA   | 901                            | 564684     | 0.16     | 63                   |
| NSANJE     | 528                            | 299168     | 0.18     | 70                   |
| PHALOMBE   | 800                            | 429450     | 0.19     |                      |
| BALAKA     | 973                            | 438379     | 0.22     |                      |
| MWANZA     | 291                            | 130949     | 0.22     |                      |
| DOWA       | 1769                           | 772569     | 0.23     |                      |
| MULANJE    | 1646                           | 684107     | 0.24     |                      |
| MANGOCHI   | 2770                           | 1148611    | 0.24     |                      |
| KASUNGU    | 2418                           | 842953     | 0.29     |                      |
| CHIRADZULU | 1072                           | 356875     | 0.30     |                      |
| CHITIPA    | 715                            | 234927     | 0.30     | 120                  |
| NKHOTAKOTA | 1373                           | 393077     | 0.35     |                      |
| NKHATABAY  | 1098                           | 284681     | 0.39     | 152                  |
| SALIMA     | 1899                           | 478346     | 0.40     | 157                  |
| MCHINJI    | 2395                           | 602305     | 0.40     |                      |
| KARONGA    | 1535                           | 365028     | 0.42     |                      |
| RUMPHI     | 1023                           | 229161     | 0.45     |                      |
| NTCHISI    | 1480                           | 317069     | 0.47     | 184                  |
| ZOMBA      | 4008                           | 746724     | 0.54     | 212                  |
| LILONGWE   | 19757                          | 2,626,902  | 0.75     | 296                  |
| NENO       | 1043                           | 138291     | 0.75     | 296                  |
| LIKOMA     | 118                            | 14527      | 0.81     | 320                  |
| MZIMBA     |                                | 940184     | 0.81     | 320                  |
| BLANTYRE   | 23332                          | 1,251,484  | 1.86     | 735                  |

### Supplementary 2, **Table S2:** Sample sheet of Enumeration areas (EA) and households per district

|               | Rural |            | Urban |            | Sample/Rural |            | Sample/Urban |            |
|---------------|-------|------------|-------|------------|--------------|------------|--------------|------------|
| DISTRICT      | EAs   | Households | EAs   | Households | EAs          | Households | EAs          | Households |
| BLANTYRE CITY |       |            | 24    | 384        |              |            | 15           | 480        |
| BLANTYRE      | 24    | 384        |       |            | 8            | 256        |              |            |
| LILONGWE CITY |       |            | 36    | 576        |              |            | 11           | 176        |
| LILONGWE      | 36    | 576        |       |            | 8            | 128        |              |            |
| MZUZU CITY    |       |            | 24    | 384        |              |            | 14           | 224        |
| ZOMBA         | 24    | 384        |       |            | 6            | 96         |              |            |
| ZOMBA CITY    |       |            | 24    | 384        |              |            | 8            | 128        |
| MZIMBA        | 24    | 384        |       |            | 6            | 96         |              |            |
| SALIMA        | 21    | 336        | 3     | 48         | 4            | 64         | 3            | 96         |
| NTCHISI       | 23    | 368        | 1     | 16         | 8            | 128        | 1            | 64         |
| DEDZA         | 23    | 368        | 1     | 16         | 2            | 32         | 1            | 32         |
| NKHATABAY     | 23    | 384        | 1     | 16         | 6            | 96         | 1            | 64         |
| THYOLO        | 23    | 384        | 1     | 16         | 2            | 32         | 1            | 32         |
| NENO          | 24    | 384        | 0     | 0          | 19           | 304        |              |            |
| MACHINGA      | 23    | 368        | 1     | 16         | 2            | 32         | 1            | 32         |
| NTCHEU        | 23    | 368        | 1     | 16         | 2            | 32         | 1            | 32         |

---

|          |    |     |   |    |    |     |   |    |
|----------|----|-----|---|----|----|-----|---|----|
| CHIKWAWA | 23 | 368 | 1 | 16 | 2  | 32  | 1 | 32 |
| CHITIPA  | 22 | 352 | 2 | 32 | 4  | 64  | 2 | 64 |
| NSANJE   | 22 | 352 | 2 | 32 | 2  | 32  | 2 | 40 |
| LIKOMA   | 23 | 384 | 1 | 16 | 20 | 320 |   |    |

---
